# Supplementary material for: Dysregulation of DNA Methylation and Epigenetic Clocks in Prostate Cancer among Puerto Rican Men
Source: MDPI journal article supplement (doi:10.3390/biom12010002), 2021-12-21
Supplement: s1 [file s1]

**Table S1.** Differentially methylated genes between aggressive (high-risk) and indolent (low-risk) prostate tumors in Puerto Rican men with prostate cancer.

| number | ProbeId    | Gene Symbol | p-value     | Mean Dif-<br>ference | Mean<br>(Low) | Mean<br>(High) |
|--------|------------|-------------|-------------|----------------------|---------------|----------------|
| 1      | cg05013909 | PRDM16      | 0.000758917 | 0.113                | 0.217         | 0.330          |
| 2      | cg10143426 | TP73        | 0.000874793 | -0.113               | 0.230         | 0.117          |
| 3      | cg17163404 | UBR4        | 0.000514859 | -0.127               | 0.602         | 0.474          |
| 4      | cg08729059 | ZNF593      | 0.000854296 | 0.072                | 0.303         | 0.374          |
| 5      | cg02833367 | PTP4A2      | 0.000341483 | -0.060               | 0.715         | 0.655          |
| 6      | cg19494946 | BMP8A       | 0.000637902 | -0.092               | 0.272         | 0.179          |
| 7      | cg23682160 | CTPS1       | 0.000657912 | -0.124               | 0.390         | 0.266          |
| 8      | cg06094523 | SLC2A1      | 0.000862398 | -0.073               | 0.458         | 0.385          |
| 9      | cg13393721 | MPL         | 0.000599594 | 0.090                | 0.124         | 0.214          |
| 10     | cg00023154 | RNF220      | 0.000297992 | -0.103               | 0.205         | 0.102          |
| 11     | cg05655221 | STIL        | 0.00043066  | -0.073               | 0.375         | 0.302          |
| 12     | cg02904015 | RABGGTB     | 0.000126125 | 0.093                | 0.126         | 0.220          |
| 13     | cg17405164 | ST6GALNAC5  | 0.000768965 | -0.102               | 0.627         | 0.525          |
| 14     | cg09499257 | CCDC18      | 0.000465526 | -0.092               | 0.687         | 0.594          |
| 15     | cg06100373 | CCDC18      | 0.000524264 | -0.077               | 0.383         | 0.306          |
| 16     | cg02472525 | PALMD       | 0.000942609 | -0.056               | 0.768         | 0.712          |
| 17     | cg13876809 | GPR88       | 0.000136333 | -0.052               | 0.788         | 0.736          |
| 18     | cg01435515 | ZNF687      | 0.000350501 | -0.102               | 0.311         | 0.209          |
| 19     | cg01474866 | CEP350      | 0.000309206 | -0.080               | 0.398         | 0.318          |
| 20     | cg18126097 | NR5A2       | 0.000727335 | -0.099               | 0.546         | 0.447          |
| 21     | cg21218864 | RASSF5      | 0.000830803 | -0.100               | 0.355         | 0.256          |
| 22     | cg22871559 | RASSF5      | 0.000454232 | -0.087               | 0.241         | 0.154          |
| 23     | cg19405931 | GPATCH2     | 0.000342785 | -0.083               | 0.689         | 0.606          |
| 24     | cg14378539 | MIR548F3    | 0.000720107 | 0.067                | 0.788         | 0.855          |
| 25     | cg14247594 | TP53BP2     | 0.000977266 | -0.096               | 0.622         | 0.526          |
| 26     | cg15975832 | TP53BP2     | 0.000777486 | -0.098               | 0.475         | 0.377          |
| 27     | cg10475729 | STRN        | 0.000910539 | -0.084               | 0.679         | 0.595          |
| 28     | cg15211026 | SPRED2      | 4.32E-05    | -0.284               | 0.587         | 0.303          |
| 29     | cg14551984 | SGOL2       | 0.000825851 | -0.083               | 0.425         | 0.342          |
| 30     | cg07227024 | ALS2CR12    | 0.000847484 | -0.177               | 0.387         | 0.211          |
| 31     | cg18899117 | PARD3B      | 0.000330358 | -0.057               | 0.778         | 0.721          |
| 32     | cg03556763 | ERBB4       | 0.000942874 | -0.055               | 0.756         | 0.701          |
| 33     | cg00007809 | SEPT2       | 0.000472597 | -0.076               | 0.640         | 0.563          |
| 34     | cg10009111 | TRNT1       | 0.000515945 | -0.115               | 0.528         | 0.413          |
| 35     | cg26986369 | SRGAP3      | 0.000374609 | -0.115               | 0.772         | 0.657          |
| 36     | cg08525922 | VGLL4       | 0.000137804 | -0.117               | 0.433         | 0.315          |
| 37     | cg00610238 | CMC1        | 0.000353204 | -0.057               | 0.802         | 0.745          |

|    |               |              |             |        |       |       |
|----|---------------|--------------|-------------|--------|-------|-------|
| 38 | cg18353563    | ABTB1        | 0.000193826 | -0.116 | 0.264 | 0.148 |
| 39 | cg16141378    | LOC729375    | 0.00056279  | -0.051 | 0.132 | 0.082 |
| 40 | cg11941811    | TMEM108      | 1.12E-05    | 0.229  | 0.454 | 0.683 |
| 41 | cg15048832    | TSC22D2      | 0.000787958 | -0.079 | 0.259 | 0.180 |
| 42 | cg25296465    | MUC20        | 0.000957367 | -0.093 | 0.709 | 0.616 |
| 43 | cg14724298    | LNK1         | 0.000526647 | -0.064 | 0.771 | 0.707 |
| 44 | cg15127930    | YTHDC1       | 0.000802867 | -0.050 | 0.797 | 0.746 |
| 45 | cg12677522    | ZNF827       | 0.000746014 | -0.086 | 0.674 | 0.588 |
| 46 | cg05840230    | TENM3        | 0.00055066  | -0.122 | 0.508 | 0.387 |
| 47 | cg16253976    | ADCY2        | 0.000390071 | -0.080 | 0.538 | 0.458 |
| 48 | cg03661461    | OSMR-AS1     | 0.000558618 | -0.113 | 0.399 | 0.286 |
| 49 | cg13566919    | GZMA         | 0.000148831 | -0.122 | 0.399 | 0.277 |
| 50 | ch.5.1443044F | AGGF1        | 0.000342593 | 0.050  | 0.065 | 0.115 |
| 51 | cg11442606    | CDC42SE2     | 0.000524379 | -0.063 | 0.797 | 0.734 |
| 52 | cg27513482    | FSTL4        | 0.000741069 | -0.093 | 0.422 | 0.328 |
| 53 | cg20518045    | SPOCK1       | 0.000301381 | -0.080 | 0.766 | 0.686 |
| 54 | cg18771857    | MATR3        | 0.000467242 | -0.080 | 0.171 | 0.091 |
| 55 | cg14710984    | MGC29506     | 0.000185415 | -0.163 | 0.725 | 0.562 |
| 56 | cg08736680    | MGC29506     | 0.000464954 | -0.101 | 0.491 | 0.391 |
| 57 | cg15263821    | FAM65B       | 0.000786055 | -0.063 | 0.785 | 0.721 |
| 58 | cg21176130    | HLA-E        | 8.56E-05    | -0.109 | 0.222 | 0.113 |
| 59 | cg09556042    | HLA-C        | 0.000140772 | -0.168 | 0.256 | 0.088 |
| 60 | cg11917734    | HLA-C        | 0.000124752 | -0.152 | 0.214 | 0.062 |
| 61 | cg11574174    | HLA-C        | 0.000485259 | -0.204 | 0.450 | 0.246 |
| 62 | cg01521131    | HLA-C        | 0.00064565  | -0.105 | 0.280 | 0.174 |
| 63 | cg11867651    | HLA-C        | 1.46E-05    | -0.173 | 0.309 | 0.135 |
| 64 | cg19732154    | GPSM3        | 0.000882858 | -0.117 | 0.249 | 0.133 |
| 65 | cg16513215    | GPSM3        | 0.000811731 | -0.148 | 0.419 | 0.271 |
| 66 | cg26053840    | GLO1         | 0.000813032 | -0.110 | 0.507 | 0.397 |
| 67 | cg14841847    | LACE1        | 0.000425888 | -0.072 | 0.289 | 0.218 |
| 68 | cg11769349    | KIAA1908     | 0.000881068 | -0.164 | 0.469 | 0.306 |
| 69 | cg23285459    | GNA12        | 0.000324891 | 0.121  | 0.597 | 0.718 |
| 70 | cg25961123    | RAPGEF5      | 0.00061486  | -0.052 | 0.817 | 0.765 |
| 71 | cg10320911    | BMPER        | 0.00047276  | 0.124  | 0.726 | 0.850 |
| 72 | cg16874554    | LOC100506725 | 8.72E-05    | 0.057  | 0.149 | 0.206 |
| 73 | cg07976112    | H2AFV        | 0.000764895 | -0.108 | 0.356 | 0.248 |
| 74 | cg12573289    | CCM2         | 0.00048533  | -0.076 | 0.553 | 0.477 |
| 75 | cg27048140    | ATP5J2       | 0.000608847 | -0.089 | 0.627 | 0.538 |
| 76 | cg22438280    | COG5         | 0.000884102 | -0.109 | 0.572 | 0.463 |
| 77 | cg02345865    | MKLN1        | 0.000693312 | -0.062 | 0.770 | 0.708 |
| 78 | cg17611936    | PRKAG2       | 0.000761281 | 0.218  | 0.428 | 0.646 |
| 79 | cg18857769    | KMT2C        | 0.000106389 | -0.091 | 0.461 | 0.370 |

|     |            |              |             |        |       |       |
|-----|------------|--------------|-------------|--------|-------|-------|
| 80  | cg08803663 | FLJ10661     | 0.000315018 | -0.056 | 0.133 | 0.078 |
| 81  | cg23957763 | DEFB134      | 0.00061027  | -0.105 | 0.527 | 0.422 |
| 82  | cg00495428 | ELAVL2       | 0.000730612 | -0.101 | 0.638 | 0.537 |
| 83  | cg02522587 | MOB3B        | 0.000993337 | -0.100 | 0.560 | 0.460 |
| 84  | cg14267542 | KIAA0649     | 4.61E-05    | -0.113 | 0.309 | 0.197 |
| 85  | cg10331073 | APBB1IP      | 0.000696745 | 0.094  | 0.166 | 0.260 |
| 86  | cg06420074 | CCNY         | 0.000123892 | 0.082  | 0.268 | 0.350 |
| 87  | cg22174486 | HRAS         | 0.000186634 | -0.112 | 0.370 | 0.258 |
| 88  | cg02030652 | BRSK2        | 1.27E-05    | -0.096 | 0.254 | 0.157 |
| 89  | cg00117796 | TEAD1        | 0.000389872 | -0.106 | 0.386 | 0.280 |
| 90  | cg10987969 | INPPL1       | 1.10E-05    | -0.066 | 0.430 | 0.365 |
| 91  | cg15279866 | ARAP1        | 0.000612813 | -0.075 | 0.665 | 0.590 |
| 92  | cg10064339 | UCP2         | 0.000485493 | -0.139 | 0.233 | 0.094 |
| 93  | cg09458566 | SIK3         | 0.000199561 | -0.114 | 0.476 | 0.362 |
| 94  | cg22997768 | TAS2R14      | 0.000695507 | -0.054 | 0.717 | 0.663 |
| 95  | cg12253142 | LRP6         | 0.00049211  | -0.105 | 0.487 | 0.382 |
| 96  | cg12254405 | MANSC1       | 0.000815639 | -0.116 | 0.583 | 0.466 |
| 97  | cg05573680 | HTR7P1       | 0.000562975 | 0.093  | 0.515 | 0.609 |
| 98  | cg16789995 | HEBP1        | 0.000253051 | 0.127  | 0.426 | 0.553 |
| 99  | cg21585975 | PLEKHA5      | 0.000588635 | -0.095 | 0.526 | 0.431 |
| 100 | cg07938212 | BICD1        | 0.000347401 | -0.102 | 0.425 | 0.323 |
| 101 | cg19293650 | KIF21A       | 0.000943484 | -0.071 | 0.394 | 0.323 |
| 102 | cg00280812 | KRT80        | 0.000793018 | -0.118 | 0.560 | 0.442 |
| 103 | cg20519295 | LOC102724421 | 0.00086942  | -0.088 | 0.688 | 0.600 |
| 104 | cg09711238 | IFNG         | 0.000395939 | -0.080 | 0.371 | 0.291 |
| 105 | cg01576496 | PPP1R12A     | 0.000779914 | -0.120 | 0.641 | 0.521 |
| 106 | cg18027157 | IGF1         | 0.000950191 | -0.100 | 0.541 | 0.441 |
| 107 | cg20074271 | C12orf42     | 0.00056127  | -0.135 | 0.566 | 0.431 |
| 108 | cg23793186 | GIT2         | 0.000727405 | -0.112 | 0.565 | 0.452 |
| 109 | cg16412776 | TCTN1        | 0.000371664 | -0.082 | 0.642 | 0.560 |
| 110 | cg06331841 | DGKH         | 0.000799419 | -0.096 | 0.524 | 0.428 |
| 111 | cg09953995 | LMO7         | 0.000702941 | -0.069 | 0.805 | 0.736 |
| 112 | cg23664361 | RNASE13      | 0.00061225  | 0.081  | 0.684 | 0.765 |
| 113 | cg27050584 | KIAA0391     | 0.000354383 | -0.091 | 0.390 | 0.300 |
| 114 | cg00771309 | TMEM260      | 0.000488084 | -0.100 | 0.422 | 0.322 |
| 115 | cg24684798 | RGS6         | 0.000855013 | 0.077  | 0.272 | 0.349 |
| 116 | cg09306332 | GRAMD2       | 0.000790499 | -0.088 | 0.716 | 0.627 |
| 117 | cg02127888 | CRAMP1L      | 0.000853591 | -0.096 | 0.399 | 0.303 |
| 118 | cg00406621 | BOLA2        | 0.000850719 | -0.072 | 0.187 | 0.115 |
| 119 | cg25206919 | TRIM72       | 0.000836752 | -0.103 | 0.216 | 0.112 |
| 120 | cg04060128 | TGFB1I1      | 0.000847413 | -0.141 | 0.686 | 0.545 |
| 121 | cg20630240 | DYNC1LI2     | 0.000730542 | 0.092  | 0.375 | 0.466 |

|     |            |              |             |        |       |       |
|-----|------------|--------------|-------------|--------|-------|-------|
| 122 | cg24867981 | LOC101927817 | 0.000531214 | -0.102 | 0.590 | 0.488 |
| 123 | cg23630423 | RTN4RL1      | 0.000783657 | 0.051  | 0.107 | 0.159 |
| 124 | cg23571857 | XAF1         | 0.000459537 | 0.086  | 0.571 | 0.657 |
| 125 | cg05949005 | SLC2A4       | 0.000810558 | -0.086 | 0.171 | 0.085 |
| 126 | cg13895343 | SARM1        | 0.000360462 | -0.116 | 0.676 | 0.561 |
| 127 | cg12139369 | CDC42EP4     | 0.000951048 | -0.084 | 0.371 | 0.287 |
| 128 | cg08267319 | LOC92659     | 4.95E-05    | -0.147 | 0.483 | 0.336 |
| 129 | cg10801102 | DUS1L        | 0.000899202 | -0.114 | 0.228 | 0.115 |
| 130 | cg02944903 | SMCHD1       | 0.000882919 | -0.104 | 0.507 | 0.402 |
| 131 | cg15184164 | CEP192       | 0.000847067 | -0.087 | 0.407 | 0.320 |
| 132 | cg24736345 | GNA11        | 0.000952583 | 0.086  | 0.737 | 0.822 |
| 133 | cg02584678 | NOTCH3       | 0.00097665  | -0.134 | 0.458 | 0.324 |
| 134 | cg11013011 | HAUS8        | 0.00046855  | -0.110 | 0.204 | 0.094 |
| 135 | cg09846076 | ZNF540       | 0.000832576 | -0.072 | 0.174 | 0.102 |
| 136 | cg03975694 | ZNF540       | 4.53E-05    | -0.187 | 0.336 | 0.149 |
| 137 | cg02798280 | MAP4K1       | 0.000636099 | 0.099  | 0.303 | 0.402 |
| 138 | cg09565670 | RINL         | 0.000379724 | -0.107 | 0.519 | 0.412 |
| 139 | cg12978040 | SAPS1        | 0.000622124 | -0.078 | 0.336 | 0.258 |
| 140 | cg08335200 | RIN2         | 0.000138318 | -0.132 | 0.399 | 0.267 |
| 141 | cg26232247 | RIN2         | 0.000947988 | -0.106 | 0.287 | 0.181 |
| 142 | cg26396492 | RIN2         | 0.000578362 | -0.119 | 0.373 | 0.254 |
| 143 | cg09035925 | RIN2         | 0.000311899 | -0.135 | 0.402 | 0.268 |
| 144 | cg04466743 | RIN2         | 0.0005589   | -0.113 | 0.516 | 0.404 |
| 145 | cg05826429 | TP53INP2     | 0.000718904 | 0.074  | 0.247 | 0.321 |
| 146 | cg11392297 | UCKL1        | 0.000467598 | -0.079 | 0.637 | 0.558 |
| 147 | cg05480278 | KRTAP6-1     | 0.000266004 | -0.070 | 0.382 | 0.312 |
| 148 | cg02289722 | APOL3        | 0.000878568 | 0.068  | 0.651 | 0.719 |
| 149 | cg04880355 | MIR1249      | 0.000866532 | -0.087 | 0.830 | 0.743 |
| 150 | cg01990106 | NLGN4X       | 0.000462668 | -0.133 | 0.612 | 0.479 |
| 151 | cg13826622 | MID1         | 0.00077462  | -0.102 | 0.686 | 0.584 |
| 152 | cg10782870 | IL1RAPL1     | 0.000736849 | -0.100 | 0.670 | 0.570 |
| 153 | cg16831427 | AWAT2        | 0.000755782 | -0.111 | 0.514 | 0.403 |
| 154 | cg12100307 | P2RY4        | 0.000783116 | -0.060 | 0.652 | 0.592 |
